# Supplementary material for: An unusually water-poor 5,5′-azobistetrazolate of dysprosium: stabilization of a nitrogen-rich heterocycle by a minimum of hydrogen bonds
Source: Royal Society of Chemistry journal article supplement (doi:10.1039/c3nj00492a), 2013-01-01
Supplement: c3nj00492a.pdf [file c3nj00492a.pdf]

***Electronic Supplementary Information (ESI)***

**An unusually water-poor 5,5'-azobistetrazolate of dysprosium: stabilization of a nitrogen-rich heterocycle by a minimum of hydrogen bonds**

Christian Knoll,<sup>a</sup> Danny Müller,<sup>a</sup> Gerald Giester,<sup>b</sup> Johannes Ofner,<sup>c</sup> Bernhard Lendl,<sup>c</sup> Peter Weinberger<sup>a</sup>  
and Georg Steinhauser<sup>d</sup>

<sup>a</sup> Institute of Applied Synthetic Chemistry, Vienna University of Technology, Getreidemarkt 9/163-AC, 1060 Vienna, Austria

<sup>b</sup> University of Vienna, Institute of Mineralogy and Crystallography, Althanstr. 14, 1090 Vienna, Austria

<sup>c</sup> Institute of Chemical Technologies and Analytics, Vienna University of Technology, Getreidemarkt 9/164, 1060 Vienna, Austria

<sup>d</sup> Department of Environmental and Radiological Health Sciences, Colorado State University, Fort Collins, Colorado 80523, United States

**Submitted to New Journal of Chemistry**

## Vibrational spectroscopy

### Raman measurement settings

Due to the strong intensity differences of the Raman peaks 3 measurements using different settings A, B and C have been performed. These settings represent changes of the number of spectra accumulated; used filter, acquisition time and slit width (see Table S1).

**Table S1:** Settings A, B and C of the Raman measurements

|   |              |                         |                        |          |
|---|--------------|-------------------------|------------------------|----------|
| A | Filter D 0.3 | 1000 $\mu\text{m}$ hole | 100 $\mu\text{m}$ slit | 5 x 1 s  |
| B | No filter    | 1000 $\mu\text{m}$ hole | 250 $\mu\text{m}$ slit | 1 x 10 s |
| C | No filter    | 1000 $\mu\text{m}$ hole | 500 $\mu\text{m}$ slit | 1 x 30 s |

### IR Spectra of 1:

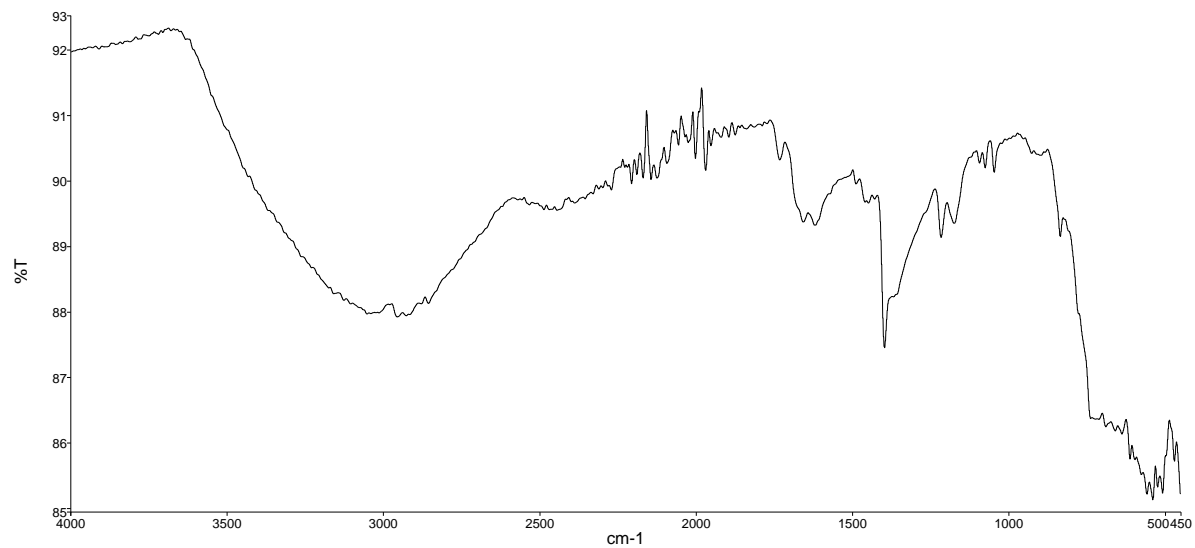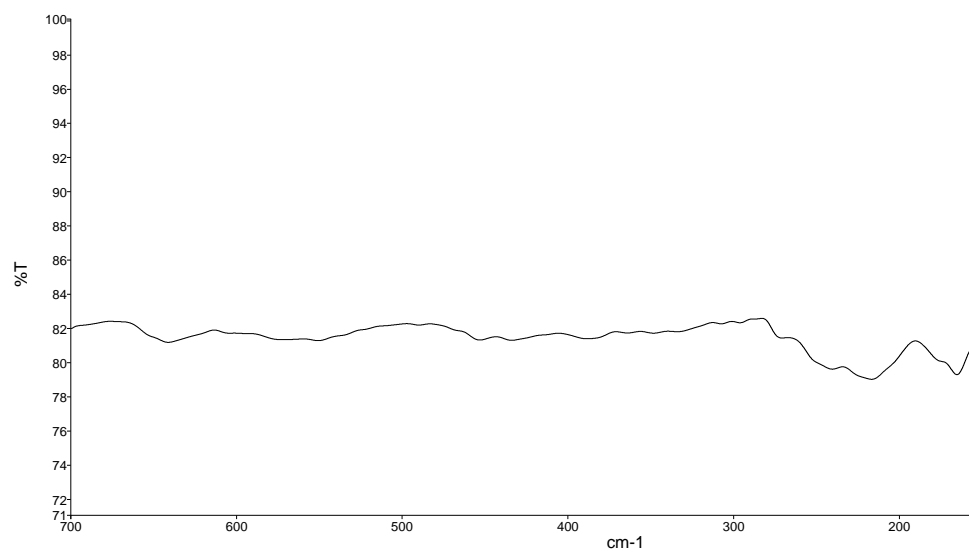

Raman Spectrum of **1**:

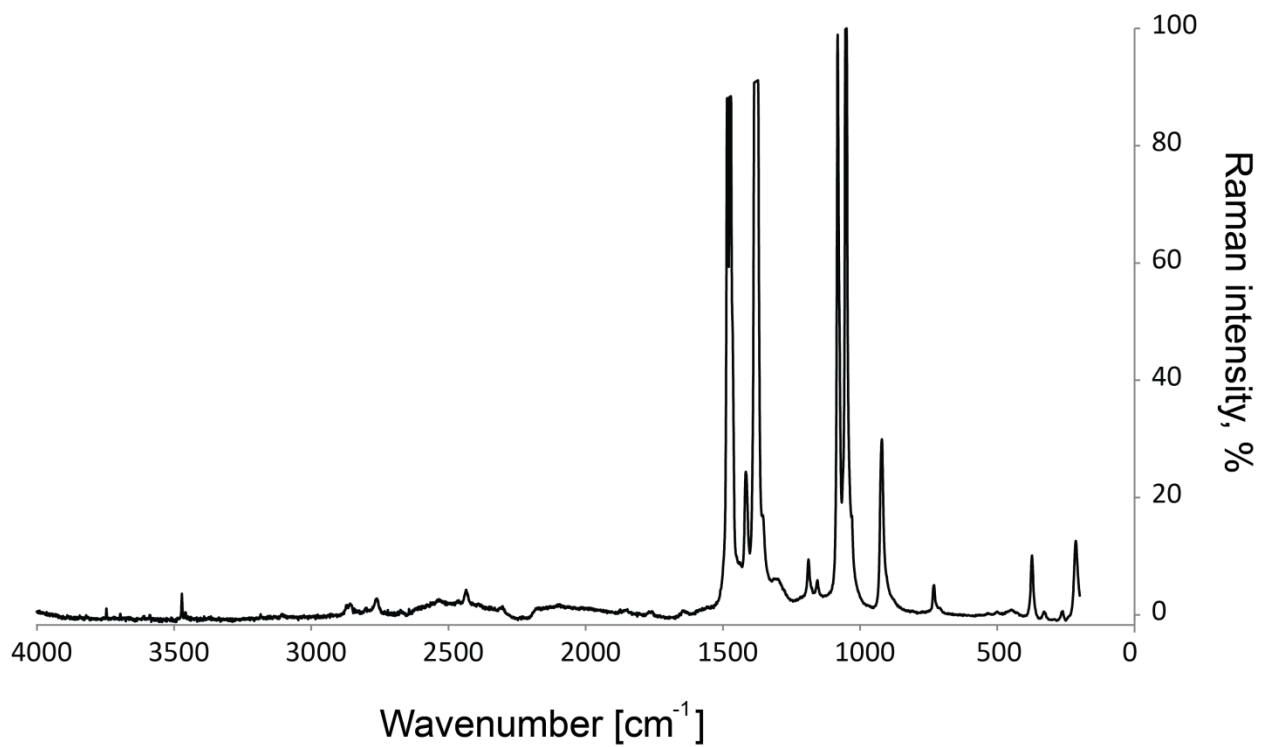

Raman Spectrum of **2**:

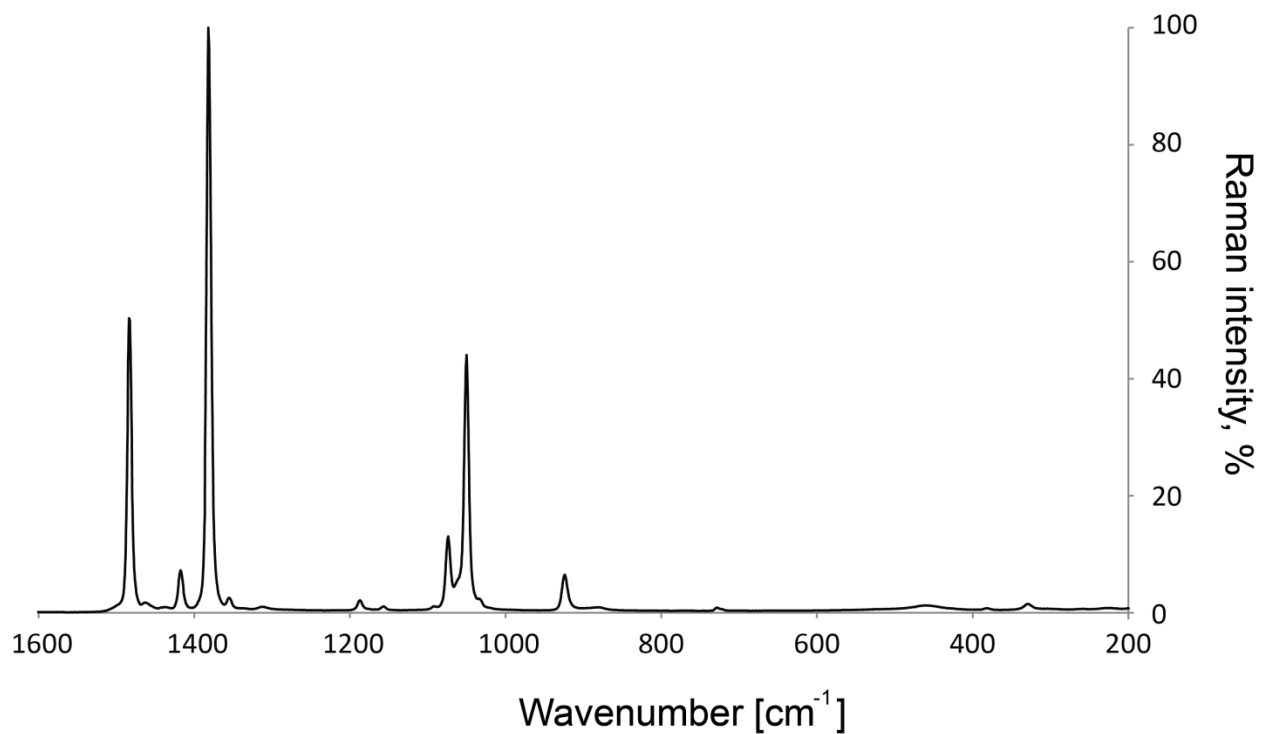

**Table S1.** Selected bond lengths (Å) and angles (°) of the ZT moiety as calculated and measured.

|                     | B3LYP | Measured (XRD) |
|---------------------|-------|----------------|
| <i>Bond lengths</i> |       |                |
| C1–N7               | 1.349 | 1.335(2)       |
| C1–N10              | 1.349 | 1.335(2)       |
| N7–N8               | 1.332 | 1.340(2)       |
| N8–N9               | 1.339 | 1.318(2)       |
| N9–N10              | 1.331 | 1.336(2)       |
| N1–C1               | 1.402 | 1.410(2)       |
| N1–N2               | 1.260 | 1.258(2)       |
| N2–C2               | 1.402 | 1.409(2)       |
| C2–N3               | 1.349 | 1.336(2)       |
| C2–N6               | 1.349 | 1.330(2)       |
| N3–N4               | 1.332 | 1.339(2)       |
| N4–N5               | 1.339 | 1.322(2)       |
| N5–N6               | 1.331 | 1.337(2)       |
| <i>Bond angles</i>  |       |                |
| N7–C1–N10           | 111.5 | 112.8(1)       |
| N7–C1–N1            | 129.4 | 128.9(1)       |
| C1–N7–N8            | 104.6 | 103.7(1)       |
| N7–N8–N9            | 109.7 | 109.8(1)       |
| N8–N9–N10           | 109.3 | 109.8(1)       |
| N9–N10–C1           | 104.9 | 104.0(1)       |
| N10–C1–N1           | 119.1 | 118.3(1)       |
| C1–N1–N2            | 115.7 | 112.5(1)       |

**Table S2.** IR and Raman frequencies of **(1)** and **(2)** vs. calculated values for **(2)** (in  $\text{cm}^{-1}$ ).

| IR <b>(1)</b> | IR <b>(2)</b> | Calc. IR <b>(2)</b> B3LYP | Raman <b>(1)</b> | Raman <b>(2)</b> | Calc. Raman <b>(2)</b> B3LYP |
|---------------|---------------|---------------------------|------------------|------------------|------------------------------|
| 1734          |               |                           | 1479             | 1483             | 1538                         |
| 1657          |               |                           | 1475             |                  |                              |
| 1620          | 1603          |                           | 1417             | 1415             | 1406                         |
|               | 1453          | 1438                      | 1381             | 1382             | 1362                         |
| 1398          | 1401          | 1380                      |                  | 1182             | 1207                         |
| 1365          |               |                           | 1090             | 1146             | 1180                         |
| 1216          |               |                           | 1057             | 1073             | 1046                         |
|               | 1195          | 1206                      | 919              | 1050             | 1033                         |
| 1174          | 1162          | 1176                      |                  | 922              | 910                          |
| 1093          | 1075          | 1042                      |                  | 374              | 370                          |
| 1075          | 1052          |                           |                  | 324              | 308                          |
| 1046          | 1041          | 1018                      |                  |                  |                              |
|               | 881           |                           |                  |                  |                              |
|               | 773           | 792                       |                  |                  |                              |
|               | 738           | 743                       |                  |                  |                              |
|               | 732           |                           |                  |                  |                              |
| 641           |               |                           |                  |                  |                              |
|               | 426           | 443                       |                  |                  |                              |
| 240           |               |                           |                  |                  |                              |
| 216           |               |                           |                  |                  |                              |
| 165           | 164           |                           |                  |                  |                              |
